# Supplementary material for: Enantioselective interactions of aminonitrile dimers
Source: Royal Society of Chemistry journal article supplement (doi:10.1039/d4cp02579b), 2024-11-26
Supplement: d4cp02579b1.pdf [file d4cp02579b1.pdf]

## Supplementary Information

### Enantioselective interactions of aminonitrile dimers

Natsuki Watanabe<sup>1</sup>, Yu Komatsu<sup>2,3</sup>, Koichi Miyagawa,<sup>4</sup> Yuta Hori<sup>4</sup>, Yasuteru Shigeta<sup>4</sup>,  
Mitsuo Shoji\*,<sup>4</sup>

\*Corresponding author: Mitsuo Shoji, [mshoji@ccs.tsukuba.ac.jp](mailto:mshoji@ccs.tsukuba.ac.jp)

Table of Contents

Table S1. Calculated interaction energies of Iva\_AN dimers with the SMD solvation model

Table S2. Interaction energies of Iva\_AN dimers in the low-lying states calculated in the gas phase

Table S3. Interaction energies of aminonitrile dimers in the most stable conformations.

Table S4. Energy contributions at the different theoretical methods

Table S5. Energy contributions of Iva\_AN in the gas phase at the different theoretical methods

Figure S1. Molecular structures of the low-lying states of Iva\_AN(LL) in the gas phase.

Figure S2. Molecular structures of the low-lying states of Iva\_AN(LD) in the gas phase.

Atomic coordinates of aminonitriles optimized at the B3LYP-D3/6-311++G\*\* are provided in the XYZ file format and in Å units.

Table S1. Calculated interaction energies ( $E_{\text{inter}}/\text{kcal mol}^{-1}$ ) of Iva-AN dimers with the SMD solvation model<sup>a</sup>

| method                              |                      | in water |        |        |        |
|-------------------------------------|----------------------|----------|--------|--------|--------|
|                                     |                      | Ala-AN   | Aba-AN | Val-AN | Iva-AN |
| $E_{\text{inter}}(\text{LL})$       | B3LYP-D3//6-311++G** | -4.05    | -5.25  | -3.33  | -4.06  |
| $E_{\text{inter}}(\text{LD})$       | B3LYP-D3//6-311++G** | -4.08    | -4.96  | -3.40  | -3.81  |
| $\Delta E_{\text{chir}}^{\text{b}}$ | B3LYP-D3//6-311++G** | 0.03     | -0.29  | 0.07   | -0.25  |

<sup>a</sup> Geometry optimizations are performed at the B3LYP-D3//6-311++G\*\* with the SMD solvation model [S1]. Zero-point vibrational energy (ZPE) and basis set superposition error (BSSE) corrections at the B3LYP-D3//6-311++G\*\* method are included for all results. Solvation effects were accounted through the SMD solvation model.

<sup>b</sup>  $\Delta E_{\text{chir}} = E_{\text{inter}}(\text{LL}) - E_{\text{inter}}(\text{LD})$ .

[S1] A. V. Marenich, C. J. Cramer, and D. G. Truhlar, J. Phys. Chem. B, 2009, 113, 6378-96.

Table S2. Interaction energies ( $E_{\text{inter}}/\text{kcal mol}^{-1}$ ) of Iva\_AN dimers in the low-lying states calculated in the gas phase<sup>a</sup>

|               | B3LYP-D3//6-311++G** | DLPNO-CCSD(T)/aug-cc-pVTZ |
|---------------|----------------------|---------------------------|
| Iva_AN_0 (LL) | <b>-9.24</b>         | -8.32                     |
| Iva_AN_1 (LL) | -9.15                | <b>-8.35</b>              |
| Iva_AN_2 (LL) | -9.15                | <b>-8.35</b>              |
| Iva_AN_3 (LL) | -8.97                | -8.34                     |
| Iva_AN_4 (LL) | -8.96                | -8.33                     |
| Iva_AN_0 (LD) | <b>-9.09</b>         | -8.34                     |
| Iva_AN_1 (LD) | -9.08                | <b>-8.39</b>              |
| Iva_AN_2(LD)  | -8.90                | -8.14                     |

<sup>a</sup> Values in the bold font indicate the most stable conformation within each theoretical level and dimer. Zero-point vibrational energy (ZPE) at the B3LYP-D3//6-311++G\*\* method and basis set superposition error (BSSE) corrections are included for all results.

Table S3. Interaction energies ( $E_{\text{inter}}/\text{kcal mol}^{-1}$ ) of aminonitrile dimers in the most stable conformations.<sup>a</sup>

| method                              |                           | in gas |        |        |        | in water |        |        |        |
|-------------------------------------|---------------------------|--------|--------|--------|--------|----------|--------|--------|--------|
|                                     |                           | Ala_AN | Aba_AN | Val_AN | Iva_AN | Ala_AN   | Aba_AN | Val_AN | Iva_AN |
| $E_{\text{inter}}(\text{LL})$       | B3LYP-D3//6-311++G**      | -8.87  | -9.27  | -9.66  | -9.24  | -3.77    | -4.55  | -4.27  | -4.39  |
|                                     | DLPNO-CCSD(T)/cc-pVTZ     | -8.85  | -8.99  | -9.36  | -7.29  | -3.30    | -3.72  | -3.85  | -3.93  |
|                                     | DLPNO-CCSD(T)/aug-cc-pVTZ | -8.25  | -8.39  | -8.88  | -8.35  | -1.98    | -2.98  | -2.42  | -2.68  |
| $E_{\text{inter}}(\text{LD})$       | B3LYP-D3//6-311++G**      | -8.70  | -8.72  | -9.28  | -9.09  | -3.86    | -4.16  | -4.47  | -4.23  |
|                                     | DLPNO-CCSD(T)/cc-pVTZ     | -8.71  | -8.77  | -8.99  | -7.33  | -3.42    | -3.87  | -3.83  | -3.85  |
|                                     | DLPNO-CCSD(T)/aug-cc-pVTZ | -8.14  | -8.15  | -8.70  | -8.39  | -2.09    | -2.47  | -2.62  | -2.60  |
| $\Delta E_{\text{chir}}^{\text{b}}$ | B3LYP-D3//6-311++G**      | -0.17  | -0.55  | -0.38  | -0.15  | 0.09     | -0.39  | 0.20   | -0.17  |
|                                     | DLPNO-CCSD(T)/cc-pVTZ     | -0.14  | -0.22  | -0.37  | 0.05   | 0.12     | 0.16   | -0.02  | -0.09  |
|                                     | DLPNO-CCSD(T)/aug-cc-pVTZ | -0.11  | -0.24  | -0.18  | 0.04   | 0.10     | -0.51  | 0.20   | -0.08  |

<sup>a</sup> Geometry optimizations are performed at the B3LYP-D3//6-311++G\*\*. Zero-point vibrational energy (ZPE) at the B3LYP-D3//6-311++G\*\* method and basis set superposition error (BSSE) corrections are included for all results. Detailed energy contributions are shown in Table S3. Solvation effects were accounted through the PCM.

<sup>b</sup>  $\Delta E_{\text{chir}} = E_{\text{inter}}(\text{LL}) - E_{\text{inter}}(\text{LD})$ .

Table S4. Energy contributions (in Hartree unit<sup>a</sup>) at the different theoretical methods.<sup>b</sup>

|        |            | in gas                    |                |                |                | in water       |                |                |                |                |
|--------|------------|---------------------------|----------------|----------------|----------------|----------------|----------------|----------------|----------------|----------------|
| method |            | Ala_AN                    | Aba_AN         | Val_AN         | Iva_AN         | Ala_AN         | Aba_AN         | Val_AN         | Iva_AN         |                |
| Energy | Dimer (LL) | B3LYP-D3//6-311++G**      | -454.814577    | -533.41362     | -612.014675    | -612.019691    | -454.827935    | -533.426999    | -612.027377    | -612.032188    |
| ZPE    |            | B3LYP-D3//6-311++G**      | 0.184828       | 0.241906       | 0.297817       | 0.297337       | 0.184658       | 0.241228       | 0.29746        | 0.296932       |
| BSSE   |            | B3LYP-D3//6-311++G**      | 0.000654023261 | 0.000792133739 | 0.000840316664 | 0.00073304731  | 0.00082803996  | 0.000781968174 | 0.001011235255 | 0.000928991243 |
| Energy |            | DLPNO-CCSD(T)/cc-pVTZ     | -454.082723204 | -532.563725878 | -611.047734106 | -611.053174692 | -454.10030208  | -532.581018432 | -611.065246667 | -611.070562495 |
| BSSE   |            | DLPNO-CCSD(T)/cc-pVTZ     | 0.00065402     | 0.00079213     | 0.00084032     | 0.00073305     | 0.00082804     | 0.00078197     | 0.00101124     | 0.00092899     |
| Energy |            | DLPNO-CCSD(T)/aug-cc-pVTZ | -454.119695577 | -532.60739729  | -611.097638857 | -611.103555209 | -454.137028523 | -532.625471595 | -611.114805452 | -611.120974735 |
| BSSE   |            | DLPNO-CCSD(T)/aug-cc-pVTZ | 0.0017874      | 0.00239254     | 0.00253092     | 0.00253621     | 0.00160772     | 0.00235572     | 0.00217765     | 0.00258268     |
| Energy | Dimer (LD) | B3LYP-D3//6-311++G**      | -454.814309    | -533.412717    | -612.013956    | -612.019389    | -454.828159    | -533.428159    | -612.027699    | -612.031895    |
| ZPE    |            | B3LYP-D3//6-311++G**      | 0.184792       | 0.241684       | 0.297701       | 0.297127       | 0.184682       | 0.241512       | 0.297515       | 0.296718       |
| BSSE   |            | B3LYP-D3//6-311++G**      | 0.000651535348 | 0.000761496026 | 0.000725734012 | 0.000692538803 | 0.000914172737 | 0.001015237144 | 0.001017102879 | 0.00090245038  |
| Energy |            | DLPNO-CCSD(T)/cc-pVTZ     | -454.08246808  | -532.563150386 | -611.047032153 | -611.0531911   | -454.100523586 | -532.581549684 | -611.065270755 | -611.070212929 |
| BSSE   |            | DLPNO-CCSD(T)/cc-pVTZ     | 0.00065154     | 0.0007615      | 0.00072573     | 0.00069254     | 0.00091417     | 0.00101524     | 0.0010171      | 0.00090245     |
| Energy |            | DLPNO-CCSD(T)/aug-cc-pVTZ | -454.119405968 | -532.606285436 | -611.096918982 | -611.103192981 | -454.137358413 | -532.624632475 | -611.115465224 | -611.120187605 |
| BSSE   |            | DLPNO-CCSD(T)/aug-cc-pVTZ | 0.00170554     | 0.00188284     | 0.00221633     | 0.00227336     | 0.00175132     | 0.00204947     | 0.00246122     | 0.00214182     |
| Energy | Mono mer   | B3LYP-D3//6-311++G**      | -227.399893    | -266.699028    | -305.999217    | -306.002113    | -227.410547    | -266.709483    | -306.00978     | -306.012128    |
| ZPE    |            | B3LYP-D3//6-311++G**      | 0.091534       | 0.12001        | 0.147921       | 0.147749       | 0.091555       | 0.119898       | 0.147887       | 0.147555       |
| Energy |            | DLPNO-CCSD(T)/cc-pVTZ     | -227.033430905 | -266.273758147 | -305.515424707 | -305.518531279 | -227.046749308 | -266.286831563 | -305.528714128 | -305.531236446 |
| Energy |            | DLPNO-CCSD(T)/aug-cc-pVTZ | -227.051501146 | -266.29487238  | -305.539491399 | -305.542959831 | -227.065355938 | -266.308466866 | -305.553543683 | -305.556145949 |

<sup>a</sup> 1 Hartree = 627.5095 kcal mol<sup>-1</sup><sup>b</sup> ZPE: zero-point vibrational energy correction, BSSE: basis set superposition error calculated with the counterpoise method

Table S5. Energy contributions (in Hartree unit<sup>a</sup>) of Iva\_AN in the gas phase at the different theoretical methods.<sup>b</sup>

| method                | Dimer (LL)                    |                |                |                | Dimer (LD)     |               |                |                |
|-----------------------|-------------------------------|----------------|----------------|----------------|----------------|---------------|----------------|----------------|
|                       | Iva_AN_0                      | Iva_AN_1       | Iva_AN_2       | Iva_AN_3       | Iva_AN_0       | Iva_AN_1      | Iva_AN_2       |                |
|                       |                               | 1              | 2              | 3              | 0              | 1             | 2              |                |
| Energy                | B3LYP-D3//6-311++G**          | -612.317029091 | -612.3167644   | -612.3167644   | -612.3162841   | -612.3165252  | -612.316516    | -612.3162271   |
| ZPE                   | B3LYP-D3//6-311++G**          | 0.297338       | 0.29722        | 0.29722        | 0.297034       | 0.297144      | 0.297127       | 0.297144       |
| BSSE                  | B3LYP-D3//6-311++G**          | 0.00073304731  | 0.000728554328 | 0.000728558855 | 0.000722087183 | 0.00066424811 | 0.000692538803 | 0.000668095303 |
| Energy<br>(wZPE&BSSE) | B3LYP-D3//6-311++G**          | -612.018958    | -612.0188159   | -612.0188159   | -612.018528    | -612.0187169  | -612.0186965   | -612.018415    |
| Energy                | DLPNO-CCSD(T)/<br>aug-cc-pVTZ | -611.103555209 | -611.10342558  | -611.103425783 | -611.102899952 | -611.10030208 | -611.065246667 | -611.070562495 |
| BSSE                  | DLPNO-CCSD(T)/<br>aug-cc-pVTZ | 0.00253621     | 0.002473269    | 0.002473221    | 0.002153446    | 0.002212824   | 0.002273357    | 0.002207407    |
| Energy<br>(wZPE&BSSE) | DLPNO-CCSD(T)/<br>aug-cc-pVTZ | -610.803681    | -610.8037324   | -610.8037325   | -610.8037125   | -610.8037253  | -610.8037926   | -610.8037238   |
| <b>monomer</b>        |                               |                |                |                |                |               |                |                |
| Energy                | B3LYP-D3//6-311++G**          | -306.002113    |                |                |                |               |                |                |
| ZPE                   | B3LYP-D3//6-311++G**          | 0.147749       |                |                |                |               |                |                |
| Energy                | DLPNO-CCSD(T)/<br>aug-cc-pVTZ | -305.5429598   |                |                |                |               |                |                |

<sup>a</sup> 1 Hartree = 627.5095 kcal mol<sup>-1</sup>

<sup>b</sup> ZPE: zero-point vibrational energy correction, BSSE: basis set superposition error calculated with the counterpoise method. Values in the bold font indicate the most stable conformation within each theoretical level and dimer.

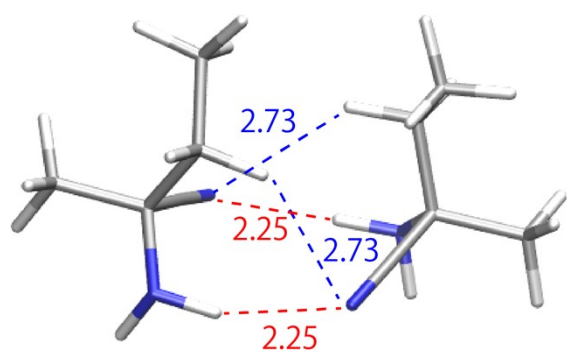

Iva\_AN\_0(LL)

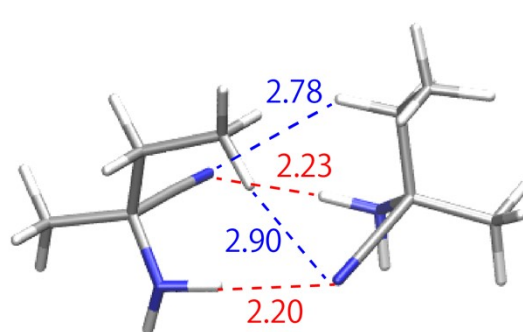

Iva\_AN\_1(LL)

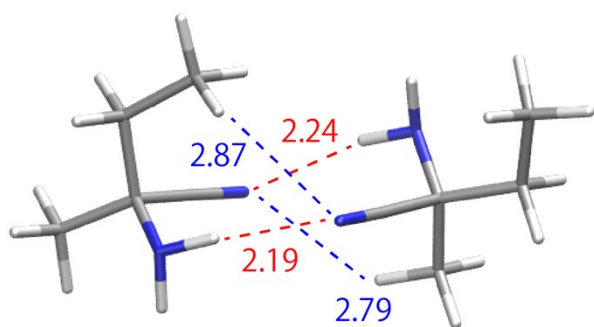

Iva\_AN\_2(LL)

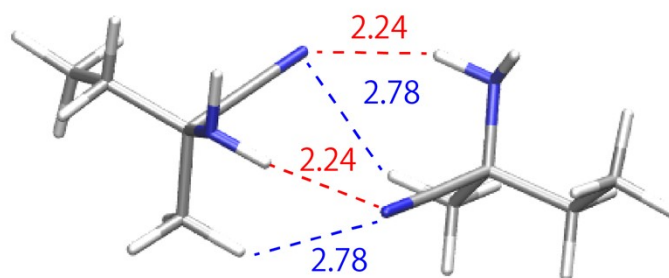

Iva\_AN\_3(LL)

Figure S1. Molecular structures of the low-lying states of Iva\_AN (LL) in the gas phase. The most stables of Iva\_AN (LL) in the gas phase are Iva\_AN\_0(LL) and Iva\_AN\_2(LL) at the theoretical levels of B3LYP-D3//6-311++G\*\* and DLPNO-CCSD(T)/aug-cc-pVTZ, respectively.

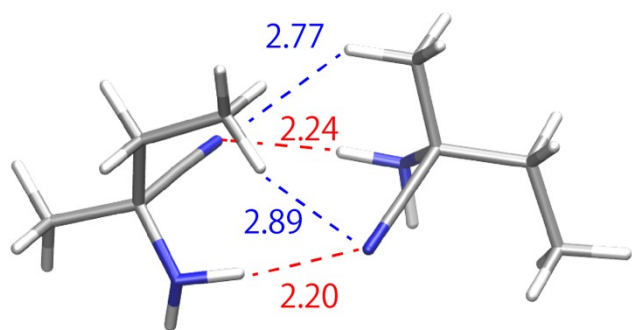

Iva\_AN\_0(LD)

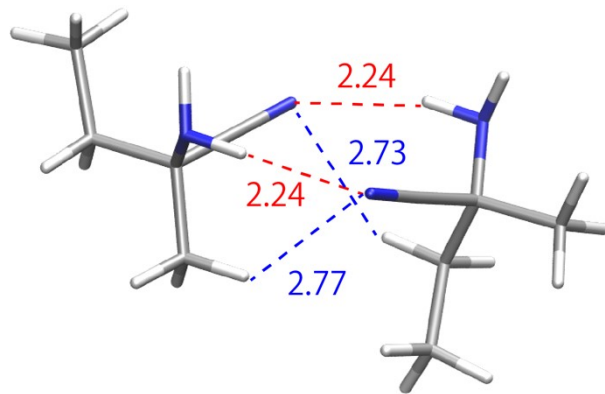

Iva\_AN\_1(LD)

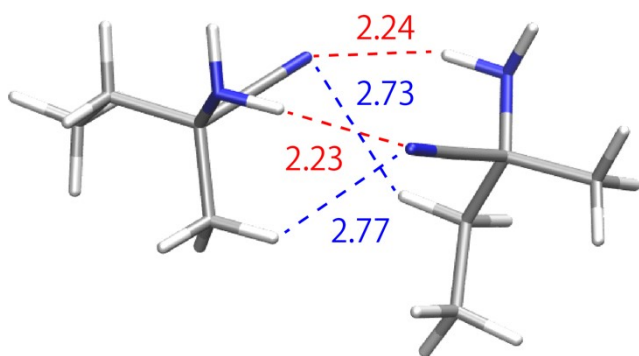

Iva\_AN\_2(LD)

Figure S2. Molecular structures of the low-lying states of Iva\_AN (LD) in the gas phase. The most stable of Iva\_AN (LD) in the gas phase are Iva\_AN\_0(LD) and Iva\_AN\_1(LD) at the theoretical levels of B3LYP-D3//6-311++G\*\* and DLPNO-CCSD(T)/aug-cc-pVTZ, respectively.



All the B3LYP-D3/6-311++G\*\* optimized structures of aminonitriles in the lowest conformation are given in the xyz file format. In the second comment lines, total energies with the ZPE correction are given in Hartree units. Atomic coordinates after the comment lines are given in Å units.

22

Energy(ZPE): -454.814577 in gas Name: L-L Ala\_AN\_0

C -2.463734 0.373926 0.005525  
 N -2.615503 -0.676901 -0.995842  
 C -1.250290 1.207537 -0.196608  
 N -0.293105 1.825391 -0.381392  
 C -2.451831 -0.231593 1.416591  
 H -3.317697 1.054067 -0.081386  
 H -2.675751 -0.293519 -1.933011  
 H -1.822556 -1.314333 -0.962747  
 H -2.363463 0.545423 2.178809  
 H -1.614804 -0.924808 1.519508  
 H -3.381724 -0.781658 1.566571  
 C 2.463734 -0.373927 0.005514  
 N 2.615506 0.676924 -0.995825  
 C 1.250287 -1.207530 -0.196636  
 N 0.293099 -1.825378 -0.381427  
 C 2.451834 0.231555 1.416596  
 H 3.317694 -1.054070 -0.081416  
 H 2.675758 0.293567 -1.933004  
 H 1.822564 1.314359 -0.962715  
 H 1.614809 0.924772 1.519529  
 H 3.381728 0.781613 1.566591  
 H 2.363461 -0.545479 2.178794

22

Energy(ZPE): -454.814309 in gas Name: D-L Ala\_AN\_1

C -2.493338 -0.313109 -0.277299  
 N -2.410682 0.934905 -1.029568  
 C -1.265549 -1.143965 -0.377490  
 N -0.292259 -1.757479 -0.470026  
 C -2.807699 -0.024674 1.197903  
 H -3.303490 -0.914990 -0.702538  
 H -2.241973 0.767254 -2.015589  
 H -1.654684 1.513107 -0.669642  
 H -3.746890 0.527529 1.251367  
 H -2.898528 -0.950263 1.770138  
 H -2.015972 0.586301 1.635904  
 C 2.493343 0.313109 0.277278  
 N 2.410727 -0.934917 1.029529  
 C 1.265550 1.143956 0.377531  
 N 0.292261 1.757464 0.470114  
 C 2.807648 0.024703 -1.197942  
 H 3.303506 0.914992 0.702495  
 H 2.242054 -0.767285 2.015559  
 H 1.654723 -1.513121 0.669620  
 H 3.746841 -0.527490 -1.251453  
 H 2.015909 -0.586272 -1.635922  
 H 2.898445 0.950302 -1.770165

22

Energy(ZPE): -454.813873 in gas Name: L-L Ala\_AN\_2

C -2.381943 -0.074873 -0.286067  
 N -2.258065 -1.328838 0.448141  
 C -1.273317 0.877074 -0.018038  
 N -0.394737 1.588770 0.213802  
 C -3.731732 0.596988 0.000087  
 H -2.322014 -0.312653 -1.352926

H -1.395166 -1.807588 0.201572  
 H -2.259264 -1.165887 1.450249  
 H -3.819767 0.842494 1.061756  
 H -4.530138 -0.097678 -0.263793  
 H -3.846523 1.517908 -0.575220  
 C 2.679117 -0.152419 -0.135886  
 N 2.567163 1.087939 -0.897705  
 C 1.568958 -1.105466 -0.393849  
 N 0.686218 -1.817083 -0.609351  
 C 2.763936 0.153218 1.366605  
 H 3.596930 -0.662219 -0.447564  
 H 2.547295 0.912373 -1.896579  
 H 1.713476 1.580039 -0.643735  
 H 3.624863 0.799778 1.541702  
 H 2.874525 -0.763197 1.950015  
 H 1.861617 0.673984 1.693203

22

Energy(ZPE): -454.813448 in gas Name: D-L Ala\_AN\_3

C 2.516857 0.141274 0.327215  
 N 2.354360 1.424282 -0.346963  
 C 1.511018 -0.872317 -0.082854  
 N 0.712872 -1.632981 -0.423951  
 C 3.933578 -0.411259 0.119914  
 H 2.354382 0.309895 1.396603  
 H 1.436837 1.819013 -0.154591  
 H 2.453430 1.321723 -1.352239  
 H 4.074022 -1.353370 0.653676  
 H 4.124364 -0.586966 -0.942101  
 H 4.651805 0.323619 0.485692  
 C -2.516306 -0.141337 -0.327430  
 N -2.354966 -1.424289 0.347117  
 C -1.510900 0.872185 0.083892  
 N -0.713248 1.632914 0.426010  
 C -3.933221 0.411474 -0.122152  
 H -2.352381 -0.310123 -1.396569  
 H -1.437400 -1.819385 0.155722  
 H -2.455067 -1.321568 1.352271  
 H -4.125446 0.587320 0.939580  
 H -4.072758 1.353557 -0.656203  
 H -4.651066 -0.323319 -0.488848

28

Energy(ZPE): -533.413620 in gas Name: L-L Aba\_AN\_0

C 2.400002 -0.382365 0.143675  
 N 2.601329 -1.351265 -0.929843  
 C 1.324624 -0.775742 1.089172  
 N 0.472669 -1.105001 1.794772  
 C 2.115620 1.014377 -0.443748  
 C 1.953313 2.113192 0.607166  
 H 3.320894 -0.327551 0.735453  
 H 2.952737 1.236390 -1.110152  
 H 1.221999 0.944961 -1.069703  
 H 1.100425 1.922773 1.264182  
 H 1.791499 3.080345 0.125800  
 H 2.845514 2.198550 1.235093  
 H 1.749300 -1.454006 -1.477294  
 H 2.852876 -2.263472 -0.564457  
 C -2.401059 -0.379410 -0.143609  
 N -2.605835 -1.346907 0.930334  
 C -1.326003 -0.776044 -1.088226  
 N -0.474482 -1.107335 -1.793404  
 C -2.113520 1.017157 0.442939  
 C -1.947523 2.114634 -0.608796

H -3.321317 -0.322542 -0.736173  
H -1.220617 0.945997 1.069668  
H -2.950678 1.241954 1.108368  
H -1.094785 1.921359 -1.265179  
H -1.783338 3.081730 -0.128104  
H -2.839078 2.201973 -1.237358  
H -1.755277 -1.450692 1.479765  
H -2.858649 -2.259009 0.565633

28

Energy(ZPE): -533.412968 in gas Name: L-L Aba\_AN\_1

C -2.209100 -0.648440 -0.381140  
N -2.460914 -1.119468 0.976944  
C -1.005481 -1.257834 -0.999610  
N -0.052236 -1.732900 -1.444370  
C -2.084697 0.890824 -0.418636  
C -3.383922 1.586930 -0.012143  
H -3.059248 -0.941851 -1.007661  
H -1.270160 1.179587 0.252015  
H -1.789932 1.192913 -1.428570  
H -4.195578 1.339347 -0.703590  
H -3.254926 2.672070 -0.022531  
H -3.689830 1.282941 0.989559  
H -2.638049 -2.117505 0.998555  
H -1.661497 -0.923143 1.575912  
C 2.534861 -0.093641 0.349464  
N 2.889575 -1.376491 -0.250241  
C 1.366576 -0.179623 1.262215  
N 0.445775 -0.278889 1.950913  
C 2.279955 0.959150 -0.747581  
C 1.976959 2.357935 -0.208733  
H 3.377372 0.244208 0.963703  
H 1.461210 0.603422 -1.379270  
H 3.179022 0.969656 -1.368691  
H 2.791912 2.726568 0.421912  
H 1.848272 3.064574 -1.031812  
H 1.060797 2.372366 0.387970  
H 2.112373 -1.737051 -0.800034  
H 3.121963 -2.065677 0.456794

28

Energy(ZPE): -533.412717 in gas Name: L-D Aba\_AN\_2

C 2.349009 0.779553 -0.514780  
N 1.852251 2.077954 -0.067395  
C 1.303351 -0.053721 -1.160832  
N 0.461774 -0.679282 -1.643202  
C 2.986391 0.017249 0.663545  
C 3.624450 -1.314999 0.267464  
H 3.118721 0.949133 -1.276427  
H 3.732864 0.692482 1.089380  
H 2.218004 -0.133504 1.427347  
H 4.091155 -1.787305 1.134889  
H 2.885411 -2.013648 -0.134227  
H 4.400009 -1.174250 -0.491978  
H 1.465847 2.614496 -0.836630  
H 1.122886 1.951880 0.630910  
C -2.348292 -0.779718 0.514627  
N -1.850773 -2.077551 0.066571  
C -1.302788 0.054290 1.160061  
N -0.461360 0.680301 1.642106  
C -2.987284 -0.017560 -0.662952  
C -3.626368 1.313858 -0.265738  
H -3.117286 -0.950108 1.276811  
H -2.219604 0.134248 -1.427249

H -3.733428 -0.693350 -1.088481  
H -4.401301 1.171851 0.494117  
H -4.094211 1.786250 -1.132515  
H -2.887749 2.012968 0.135899  
H -1.121934 -1.950792 -0.632154  
H -1.463443 -2.614019 0.835381

28

Energy(ZPE): -533.412600 in gas Name: D-L Aba\_AN\_3

C 2.124004 0.325623 0.381440  
N 2.149443 1.749967 0.695228  
C 1.225329 -0.003330 -0.753778  
N 0.520914 -0.216903 -1.642905  
C 3.544024 -0.208029 0.113974  
C 3.607943 -1.721068 -0.102137  
H 1.713379 -0.195486 1.253002  
H 4.144590 0.086459 0.978123  
H 3.956658 0.317217 -0.754638  
H 3.211912 -2.259365 0.764568  
H 3.033762 -2.028420 -0.980294  
H 4.640903 -2.044057 -0.250067  
H 2.447819 2.295525 -0.107082  
H 1.226660 2.068904 0.979516  
C -2.715403 0.316135 -0.276131  
N -2.560103 0.637085 -1.692175  
C -1.738785 1.023942 0.590710  
N -0.956354 1.584660 1.227550  
C -2.621956 -1.206785 -0.058698  
C -2.865667 -1.642894 1.386794  
H -3.707941 0.651631 0.045774  
H -1.639183 -1.541594 -0.403123  
H -3.362694 -1.651902 -0.727674  
H -2.823911 -2.731366 1.469592  
H -2.116095 -1.228096 2.066370  
H -3.850782 -1.320344 1.738191  
H -2.675132 1.630327 -1.863000  
H -1.634182 0.365337 -2.016197

34

Energy(ZPE): -612.014675 in gas Name: L-L Val\_AN\_0

C 2.428248 -0.718003 0.174528  
N 2.480441 -1.463481 -1.080692  
C 1.319237 -1.169490 1.050751  
N 0.434587 -1.543819 1.690393  
C 2.329716 0.810765 -0.079429  
C 2.229339 1.593380 1.235444  
C 3.527808 1.284637 -0.909772  
H 3.356697 -0.907733 0.726802  
H 1.414633 0.971748 -0.661022  
H 1.355268 1.307140 1.824300  
H 2.158292 2.664557 1.031118  
H 3.120609 1.432435 1.851737  
H 3.606880 0.733934 -1.846537  
H 4.461416 1.145079 -0.353249  
H 3.429784 2.350059 -1.134560  
H 1.608379 -1.350685 -1.593925  
H 2.626772 -2.453289 -0.916472  
C -2.651749 -0.644786 -0.314904  
N -2.595229 -1.639927 0.752715  
C -1.462356 -0.684183 -1.203510  
N -0.511409 -0.736122 -1.855295  
C -2.873474 0.787254 0.240444  
C -3.168322 1.780682 -0.889774  
C -1.707430 1.266358 1.111661

H -3.512602 -0.884359 -0.948042  
H -3.762922 0.689873 0.871308  
H -3.405932 2.764424 -0.477417  
H -2.303968 1.898529 -1.550793  
H -4.018460 1.459018 -1.498974  
H -0.794473 1.371275 0.518222  
H -1.498582 0.580430 1.934301  
H -1.938297 2.244498 1.541411  
H -1.715969 -1.594707 1.263353  
H -2.672356 -2.578481 0.375961

34

Energy(ZPE): -612.014057 in gas Name: L-L Val\_AN\_1

C 2.488698 -0.535328 0.543871  
N 2.643587 -1.722501 -0.292966  
C 1.282901 -0.608941 1.405520  
N 0.326055 -0.705015 2.043596  
C 2.464121 0.760688 -0.311119  
C 3.752439 0.873158 -1.133930  
C 2.260186 2.005260 0.561362  
H 3.350176 -0.475556 1.220103  
H 1.616243 0.664566 -0.999340  
H 3.711173 1.757600 -1.775253  
H 4.621974 0.978106 -0.475349  
H 3.905284 -0.006546 -1.758266  
H 3.082247 2.116155 1.276921  
H 2.241610 2.902619 -0.061983  
H 1.325036 1.970617 1.124578  
H 2.743062 -2.560297 0.269420  
H 1.831149 -1.837517 -0.895718  
C -2.521254 -0.762735 -0.454793  
N -2.591684 -1.220634 0.929678  
C -1.248716 -1.133853 -1.122208  
N -0.237664 -1.422809 -1.597923  
C -2.763941 0.768050 -0.585834  
C -1.706076 1.588720 0.161274  
C -4.181179 1.114817 -0.117131  
H -3.316361 -1.266470 -1.014732  
H -2.684195 0.998304 -1.655385  
H -1.881583 2.656224 0.006342  
H -0.696844 1.360723 -0.188821  
H -1.741923 1.396938 1.236479  
H -4.370040 2.183905 -0.245253  
H -4.308633 0.862363 0.937002  
H -4.936998 0.568810 -0.690037  
H -2.677256 -2.229683 0.974893  
H -1.759251 -0.963167 1.455632

34

Energy(ZPE): -612.013956 in gas Name: L-D Val\_AN\_2

C -1.904159 -0.304148 -0.541041  
N -2.128228 -1.655732 -1.045260  
C -1.218715 -0.283227 0.774632  
N -0.681955 -0.297193 1.796260  
C -3.208899 0.531204 -0.495881  
C -4.253461 -0.071722 0.450150  
C -2.916853 1.995853 -0.148106  
H -1.217395 0.184894 -1.239045  
H -3.595017 0.478233 -1.519021  
H -4.525262 -1.089236 0.158921  
H -5.168030 0.526523 0.434488  
H -3.886812 -0.091093 1.481646  
H -2.533770 2.093964 0.872221  
H -3.829431 2.592889 -0.218872

H -2.178772 2.430344 -0.829191  
H -1.238297 -2.086980 -1.279270  
H -2.595546 -2.237713 -0.358964  
C 2.822028 -0.647244 0.369653  
N 2.461475 -0.873320 1.766830  
C 1.830240 -1.208301 -0.583269  
N 1.026665 -1.642381 -1.288815  
C 3.078267 0.854534 0.073689  
C 3.679756 1.048813 -1.323418  
C 1.825314 1.716048 0.265645  
H 3.760075 -1.179298 0.178988  
H 3.818886 1.147858 0.824772  
H 2.971054 0.758607 -2.105339  
H 3.936972 2.098884 -1.482808  
H 4.590661 0.457393 -1.456764  
H 1.403728 1.613992 1.266662  
H 2.069557 2.770113 0.110878  
H 1.049770 1.445479 -0.458046  
H 1.512452 -0.565350 1.966149  
H 2.508359 -1.859982 1.997157

34

Energy(ZPE): -612.013905 in gas Name: D-L Val\_AN\_3

C -2.426595 0.528535 -0.943661  
N -1.801103 1.845791 -0.860953  
C -1.438777 -0.575269 -1.049705  
N -0.638476 -1.404406 -1.110570  
C -3.400320 0.277970 0.238490  
C -2.683906 0.248002 1.593235  
C -4.225831 -0.994895 0.015101  
H -3.017824 0.497717 -1.865057  
H -4.069025 1.144691 0.216801  
H -3.413786 0.130884 2.398506  
H -2.120080 1.162652 1.782717  
H -1.986908 -0.594108 1.648664  
H -4.761154 -0.967230 -0.938920  
H -4.966274 -1.110525 0.810468  
H -3.591146 -1.886503 0.021250  
H -1.324877 2.075472 -1.726537  
H -1.108967 1.885083 -0.115851  
C 2.426713 -0.528468 0.943771  
N 1.801191 -1.845700 0.861091  
C 1.438917 0.575355 1.049822  
N 0.638685 1.404562 1.110631  
C 3.400346 -0.277965 -0.238463  
C 4.225420 0.995259 -0.015508  
C 2.683868 -0.248694 -1.593188  
H 3.017983 -0.497619 1.865138  
H 4.069326 -1.144466 -0.216506  
H 4.760819 0.968067 0.938484  
H 4.965767 1.110917 -0.810960  
H 3.590420 1.886643 -0.021878  
H 3.413680 -0.131737 -2.398544  
H 2.120236 -1.163552 -1.782264  
H 1.986678 0.593236 -1.648920  
H 1.324969 -2.075359 1.726681  
H 1.109068 -1.884980 0.115976

34

Energy(ZPE): -612.019691 in gas Name: L-L Iva\_AN\_0

C -2.453320 -0.332754 0.139457  
N -2.442792 -1.286783 1.251178  
C -1.481671 -0.726253 -0.919461  
N -0.713607 -1.051894 -1.717371

|   |           |           |           |
|---|-----------|-----------|-----------|
| C | -3.861260 | -0.309619 | -0.481223 |
| C | -2.043281 | 1.053455  | 0.699580  |
| C | -1.937905 | 2.181354  | -0.328327 |
| H | -3.913213 | 0.365349  | -1.336380 |
| H | -4.570708 | 0.014994  | 0.282257  |
| H | -4.147629 | -1.307997 | -0.821241 |
| H | -1.087443 | 0.930965  | 1.215401  |
| H | -2.784566 | 1.296085  | 1.465965  |
| H | -1.599544 | 3.098874  | 0.158727  |
| H | -2.898917 | 2.396315  | -0.801678 |
| H | -1.220201 | 1.942657  | -1.117971 |
| H | -1.514880 | -1.351619 | 1.665148  |
| H | -2.712319 | -2.214530 | 0.939549  |
| C | 2.453407  | -0.332624 | -0.139475 |
| N | 2.443025  | -1.286594 | -1.251229 |
| C | 1.481934  | -0.726435 | 0.919488  |
| N | 0.713863  | -1.051965 | 1.717438  |
| C | 3.861385  | -0.309202 | 0.481106  |
| C | 2.042993  | 1.053504  | -0.699540 |
| C | 1.937385  | 2.181351  | 0.328402  |
| H | 4.570707  | 0.015582  | -0.282418 |
| H | 4.147994  | -1.307525 | 0.821084  |
| H | 3.913252  | 0.365758  | 1.336273  |
| H | 1.087144  | 0.930779  | -1.215293 |
| H | 2.784150  | 1.296353  | -1.465981 |
| H | 1.598760  | 3.098793  | -0.158614 |
| H | 1.219788  | 1.942457  | 1.118083  |
| H | 2.898369  | 2.396552  | 0.801701  |
| H | 2.712733  | -2.214300 | -0.939631 |
| H | 1.515099  | -1.351560 | -1.665138 |

34

Energy(ZPE): -612.019389 in gas Name: D-L Iva\_AN\_1

|   |           |           |           |
|---|-----------|-----------|-----------|
| C | -2.345967 | 0.055690  | 0.426794  |
| N | -2.265887 | -1.338951 | 0.865220  |
| C | -1.406149 | 0.330323  | -0.697922 |
| N | -0.669370 | 0.513546  | -1.567382 |
| C | -1.951518 | 0.960357  | 1.608718  |
| C | -3.783760 | 0.386433  | -0.042873 |
| C | -4.292499 | -0.450495 | -1.218814 |
| H | -1.990658 | 2.014087  | 1.324653  |
| H | -0.943379 | 0.723268  | 1.952576  |
| H | -2.649499 | 0.780702  | 2.428437  |
| H | -4.428275 | 0.238829  | 0.828362  |
| H | -3.820456 | 1.449230  | -0.302538 |
| H | -3.641585 | -0.353565 | -2.092437 |
| H | -5.292089 | -0.120898 | -1.511922 |
| H | -4.366762 | -1.509721 | -0.958883 |
| H | -2.461672 | -1.979739 | 0.103907  |
| H | -1.332668 | -1.548726 | 1.213241  |
| C | 2.802127  | -0.314055 | -0.187007 |
| N | 2.386603  | -0.336701 | -1.590485 |
| C | 1.736376  | -0.854348 | 0.704710  |
| N | 0.885316  | -1.272906 | 1.362782  |
| C | 4.052995  | -1.196931 | -0.025978 |
| C | 3.122082  | 1.138710  | 0.245098  |
| C | 1.950243  | 2.118667  | 0.163161  |
| H | 4.405424  | -1.194261 | 1.007202  |
| H | 4.838206  | -0.807222 | -0.676454 |
| H | 3.841748  | -2.230024 | -0.313670 |
| H | 3.934660  | 1.471285  | -0.407204 |
| H | 3.511672  | 1.111266  | 1.268048  |
| H | 1.564279  | 2.207121  | -0.853873 |

|   |          |           |           |
|---|----------|-----------|-----------|
| H | 1.124092 | 1.809141  | 0.808375  |
| H | 2.271340 | 3.112243  | 0.485433  |
| H | 2.288590 | -1.291953 | -1.919869 |
| H | 1.486807 | 0.117914  | -1.729648 |

34

Energy(ZPE): -612.019250 in gas Name: L-L Iva\_AN\_2

|   |           |           |           |
|---|-----------|-----------|-----------|
| C | -2.818610 | -0.143106 | 0.133567  |
| N | -2.459531 | 0.090946  | 1.533156  |
| C | -1.761500 | -0.914513 | -0.580594 |
| N | -0.916216 | -1.498809 | -1.106666 |
| C | -4.123173 | -0.958683 | 0.085807  |
| C | -3.013352 | 1.211156  | -0.593430 |
| C | -1.773323 | 2.105550  | -0.650494 |
| H | -4.433986 | -1.143092 | -0.944281 |
| H | -3.999187 | -1.923335 | 0.584580  |
| H | -4.902624 | -0.396294 | 0.603202  |
| H | -3.368532 | 1.004267  | -1.608283 |
| H | -3.820168 | 1.722402  | -0.060448 |
| H | -1.419693 | 2.375570  | 0.346014  |
| H | -0.949852 | 1.612684  | -1.174350 |
| H | -2.004281 | 3.030329  | -1.184871 |
| H | -1.538435 | 0.513904  | 1.624278  |
| H | -2.436332 | -0.783257 | 2.048705  |
| C | 2.402431  | -0.520645 | -0.027417 |
| N | 2.055400  | -0.385604 | -1.443887 |
| C | 1.417275  | 0.179811  | 0.845338  |
| N | 0.639877  | 0.736388  | 1.492015  |
| C | 2.382395  | -2.016441 | 0.336836  |
| C | 3.805274  | 0.078429  | 0.236820  |
| C | 3.948946  | 1.565799  | -0.093832 |
| H | 2.640580  | -2.165301 | 1.387423  |
| H | 3.110411  | -2.534002 | -0.290638 |
| H | 1.394747  | -2.442016 | 0.150898  |
| H | 4.055304  | -0.092322 | 1.288760  |
| H | 4.503762  | -0.508582 | -0.366281 |
| H | 3.232300  | 2.173009  | 0.466606  |
| H | 3.805630  | 1.758073  | -1.160403 |
| H | 4.951781  | 1.914704  | 0.163591  |
| H | 1.984390  | 0.587700  | -1.719773 |
| H | 1.159289  | -0.829028 | -1.632668 |

34

Energy(ZPE): -612.019084 in gas Name: D-L Iva\_AN\_3

|   |           |           |           |
|---|-----------|-----------|-----------|
| C | -2.616416 | -0.176146 | -0.330533 |
| N | -2.459252 | -0.695802 | -1.691090 |
| C | -1.708963 | -0.874380 | 0.623182  |
| N | -0.987952 | -1.426696 | 1.335739  |
| C | -4.067795 | -0.409684 | 0.124569  |
| C | -2.248739 | 1.329726  | -0.351526 |
| C | -2.302050 | 2.044431  | 0.999983  |
| H | -4.318321 | -1.472463 | 0.078343  |
| H | -4.228793 | -0.069798 | 1.148333  |
| H | -4.733139 | 0.134347  | -0.548438 |
| H | -2.937522 | 1.794223  | -1.062643 |
| H | -1.246633 | 1.419492  | -0.779579 |
| H | -1.635154 | 1.577610  | 1.730271  |
| H | -3.310126 | 2.051107  | 1.421509  |
| H | -1.988964 | 3.084780  | 0.884160  |
| H | -1.500753 | -0.581783 | -2.014809 |
| H | -2.690204 | -1.683311 | -1.734912 |
| C | 2.295203  | -0.309295 | 0.342476  |
| N | 2.178481  | -1.599248 | 1.026478  |
| C | 1.402685  | -0.246514 | -0.849165 |

N 0.700112 -0.228676 -1.765027  
C 1.869575 0.798424 1.323762  
C 3.760879 -0.137516 -0.128664  
C 4.070655 1.161461 -0.875051  
H 2.561696 0.796608 2.167936  
H 1.878546 1.780622 0.849219  
H 0.863616 0.602459 1.697803  
H 4.375538 -0.223744 0.771692  
H 4.012013 -0.993473 -0.765073  
H 5.112855 1.165473 -1.202753  
H 3.443194 1.275095 -1.763318  
H 3.923361 2.038910 -0.240961  
H 1.221062 -1.762661 1.331441  
H 2.447805 -2.363586 0.414883

22  
Energy(ZPE): -454.828159 in water Name: D-L Ala\_AN

C -1.607576 -0.039386 -0.020687  
N -0.954530 1.207144 -0.436260  
C -2.971991 0.180881 0.513498  
N -4.033719 0.379336 0.921109  
C -1.644728 -1.042924 -1.180180  
H -1.020151 -0.468068 0.795768  
H -0.904182 1.870544 0.331348  
H -1.474848 1.652970 -1.187257  
H -2.109979 -1.979318 -0.868744  
H -0.622433 -1.246898 -1.499190  
H -2.206296 -0.635863 -2.024378  
C 2.603857 0.047625 -0.088365  
N 1.996736 0.572609 -1.311228  
C 1.859773 -1.113866 0.462846  
N 1.240204 -2.002349 0.863808  
C 2.715429 1.144870 0.979763  
H 3.606422 -0.318875 -0.327491  
H 2.008526 -0.123810 -2.050059  
H 1.021690 0.832151 -1.135404  
H 1.726911 1.536921 1.228589  
H 3.179787 0.762119 1.890440  
H 3.325132 1.957748 0.583121

22  
Energy(ZPE): -454.827945 in water Name: L-L Ala\_AN

C 1.784836 0.021661 0.059737  
N 1.164609 -1.155774 -0.558142  
C 3.184881 0.227040 -0.380083  
N 4.275132 0.361862 -0.735039  
C 1.713105 -0.067774 1.589612  
H 1.224842 0.902028 -0.266612  
H 1.677024 -2.001000 -0.320629  
H 1.157501 -1.079541 -1.571017  
H 2.238614 -0.955390 1.949846  
H 2.158119 0.814523 2.052229  
H 0.666175 -0.132113 1.887919  
C -2.422506 -0.201475 -0.441088  
N -1.842282 -1.324017 0.294622  
C -1.724372 1.079846 -0.163021  
N -1.147083 2.050381 0.079590  
C -3.922777 -0.059263 -0.154025  
H -2.282303 -0.391365 -1.509710  
H -1.958582 -1.189711 1.295392  
H -0.840392 -1.395160 0.097274  
H -4.421400 -0.988991 -0.431588  
H -4.357426 0.762235 -0.726220  
H -4.093814 0.127106 0.909107

28  
Energy(ZPE): -533.426999 in water Name: L-L Aba\_AN

C 2.391714 -0.352985 0.045461  
N 2.510579 -1.276910 -1.083376  
C 1.424821 -0.827971 1.066613  
N 0.650034 -1.218972 1.828233  
C 2.004483 1.057308 -0.441601  
C 1.944987 2.106514 0.668990  
H 3.362460 -0.295366 0.547911  
H 2.752854 1.335045 -1.187640  
H 1.045220 0.992521 -0.962652  
H 1.692071 3.083841 0.252644  
H 1.189552 1.862160 1.420743  
H 2.908779 2.195408 1.178386  
H 2.842698 -2.186242 -0.777587  
H 1.603846 -1.411260 -1.525940  
C -2.391648 -0.353154 -0.045526  
N -2.510480 -1.277184 1.083266  
C -1.424669 -0.827941 -1.066646  
N -0.649776 -1.218789 -1.828237  
C -2.004593 1.057143 0.441663  
C -1.945326 2.106457 -0.668842  
H -3.362399 -0.295636 -0.547970  
H -2.752964 1.334701 1.187766  
H -1.045289 0.992441 0.962653  
H -1.189817 1.862340 -1.420598  
H -1.692663 3.083811 -0.252408  
H -2.909131 2.195159 -1.178248  
H -2.842631 -2.186480 0.777374  
H -1.603699 -1.411670 1.525698

28  
Energy(ZPE): -533.426610 in water Name: D-L Aba\_AN

C -1.647069 -0.436203 0.052572  
N -0.925624 -1.242705 1.043922  
C -2.840190 -1.132553 -0.481921  
N -3.767026 -1.698430 -0.873875  
C -2.031347 0.933852 0.641956  
C -2.681248 1.875814 -0.371820  
H -0.977313 -0.269163 -0.796203  
H -2.691730 0.775617 1.500823  
H -1.105548 1.371389 1.021731  
H -2.892859 2.841985 0.091364  
H -2.015634 2.046991 -1.221806  
H -3.625575 1.474225 -0.749544  
H -0.642890 -2.137299 0.654485  
H -1.516801 -1.437635 1.847645  
C 2.406427 0.414201 0.549596  
N 1.715635 0.265423 1.830602  
C 1.593784 1.153666 -0.449386  
N 0.921316 1.716666 -1.200957  
C 2.816193 -0.962091 -0.010847  
C 3.618048 -0.891455 -1.311098  
H 3.311518 1.009900 0.706885  
H 1.912685 -1.563794 -0.150206  
H 3.403884 -1.444678 0.774001  
H 4.524787 -0.293004 -1.182342  
H 3.033727 -0.449330 -2.122775  
H 3.918977 -1.892990 -1.626246  
H 0.824982 -0.221500 1.694662  
H 1.520097 1.171224 2.245370

34  
Energy(ZPE): -612.027702 in water Name: D-L Val\_AN

|   |           |           |           |
|---|-----------|-----------|-----------|
| C | -1.960901 | -0.683551 | -0.180608 |
| N | -1.332256 | -1.318329 | 0.983216  |
| C | -3.418707 | -0.943954 | -0.247975 |
| N | -4.552910 | -1.157950 | -0.269842 |
| C | -1.658855 | 0.835492  | -0.239922 |
| C | -2.196776 | 1.593693  | 0.978162  |
| C | -2.158735 | 1.447633  | -1.552926 |
| H | -1.529319 | -1.141680 | -1.075263 |
| H | -0.568154 | 0.895547  | -0.225085 |
| H | -3.287934 | 1.527880  | 1.037217  |
| H | -1.930387 | 2.650571  | 0.903772  |
| H | -1.776611 | 1.218589  | 1.914575  |
| H | -1.762639 | 0.911355  | -2.420021 |
| H | -3.251479 | 1.431140  | -1.611338 |
| H | -1.838238 | 2.489480  | -1.625361 |
| H | -1.782353 | -1.030077 | 1.846899  |
| H | -1.413676 | -2.329380 | 0.930113  |
| C | 2.594158  | -0.117307 | 0.883367  |
| N | 1.695787  | -0.861230 | 1.765181  |
| C | 2.109545  | 1.258542  | 0.601344  |
| N | 1.700414  | 2.320130  | 0.402682  |
| C | 2.883505  | -0.881714 | -0.435257 |
| C | 1.619817  | -1.119882 | -1.269438 |
| C | 3.971693  | -0.181530 | -1.257823 |
| H | 3.548305  | 0.007326  | 1.404963  |
| H | 3.267110  | -1.851460 | -0.101831 |
| H | 0.859175  | -1.665968 | -0.708321 |
| H | 1.187207  | -0.172752 | -1.607802 |
| H | 1.863582  | -1.707134 | -2.157986 |
| H | 4.234875  | -0.788872 | -2.127081 |
| H | 3.628625  | 0.790910  | -1.624853 |
| H | 4.879758  | -0.022221 | -0.669325 |
| H | 0.743028  | -0.918377 | 1.397776  |
| H | 1.643409  | -0.417756 | 2.676754  |

34

Energy(ZPE): -612.027377 in water Name: L-L Val\_AN

|   |           |           |           |
|---|-----------|-----------|-----------|
| C | 2.101054  | -0.538505 | -0.409007 |
| N | 1.390696  | 0.068484  | -1.534321 |
| C | 1.458754  | -0.231032 | 0.895219  |
| N | 0.921774  | 0.027552  | 1.884502  |
| C | 3.606766  | -0.169733 | -0.385575 |
| C | 4.358344  | -0.971445 | 0.683820  |
| C | 3.841345  | 1.336429  | -0.220950 |
| H | 2.028820  | -1.624657 | -0.524047 |
| H | 3.972481  | -0.473795 | -1.371772 |
| H | 4.036005  | -0.690133 | 1.691331  |
| H | 5.431530  | -0.778781 | 0.613970  |
| H | 4.199512  | -2.046933 | 0.563790  |
| H | 3.448826  | 1.693919  | 0.736588  |
| H | 3.375904  | 1.916731  | -1.021322 |
| H | 4.912326  | 1.552099  | -0.242100 |
| H | 1.357157  | 1.078895  | -1.441427 |
| H | 0.426264  | -0.273585 | -1.557564 |
| C | -2.055138 | -0.591736 | 0.034763  |
| N | -1.459612 | -1.158314 | -1.181904 |
| C | -3.419199 | -1.112064 | 0.287768  |
| N | -4.481977 | -1.530790 | 0.455052  |
| C | -2.040581 | 0.959002  | 0.017827  |
| C | -2.844058 | 1.544648  | -1.148247 |
| C | -2.501545 | 1.526743  | 1.364593  |
| H | -1.440320 | -0.913702 | 0.879559  |
| H | -0.986358 | 1.216186  | -0.119343 |

|   |           |           |           |
|---|-----------|-----------|-----------|
| H | -2.779705 | 2.635257  | -1.133602 |
| H | -3.902055 | 1.272799  | -1.075652 |
| H | -2.467675 | 1.209276  | -2.117765 |
| H | -3.557588 | 1.306791  | 1.549604  |
| H | -1.913747 | 1.114832  | 2.188993  |
| H | -2.382743 | 2.612772  | 1.373293  |
| H | -1.333238 | -2.161476 | -1.087023 |
| H | -2.056007 | -1.008851 | -1.990092 |

34

Energy(ZPE): -612.032411 in water Name: L-L Iva\_AN

|   |           |           |           |
|---|-----------|-----------|-----------|
| C | -2.111553 | -0.444173 | -0.056424 |
| N | -1.345680 | -0.175855 | -1.284494 |
| C | -3.574953 | -0.433961 | -0.331586 |
| N | -4.705144 | -0.422799 | -0.568099 |
| C | -1.727996 | -1.839907 | 0.467928  |
| C | -1.798133 | 0.631822  | 1.011607  |
| C | -2.109162 | 2.072186  | 0.601057  |
| H | -0.661128 | -1.845061 | 0.695950  |
| H | -2.284890 | -2.078290 | 1.375608  |
| H | -1.933896 | -2.609152 | -0.279844 |
| H | -2.355743 | 0.375438  | 1.916931  |
| H | -0.737672 | 0.526761  | 1.250660  |
| H | -3.161973 | 2.197545  | 0.332658  |
| H | -1.895445 | 2.748911  | 1.431316  |
| H | -1.497971 | 2.397529  | -0.244100 |
| H | -1.543023 | -0.879635 | -1.991017 |
| H | -1.593078 | 0.722614  | -1.687726 |
| C | 2.631412  | -0.287828 | -0.209602 |
| N | 1.729414  | -0.863091 | -1.211887 |
| C | 2.076723  | -0.457117 | 1.164300  |
| N | 1.612339  | -0.606783 | 2.211431  |
| C | 3.983512  | -1.022224 | -0.268833 |
| C | 2.836847  | 1.223053  | -0.479742 |
| C | 1.566997  | 2.074194  | -0.434170 |
| H | 4.682366  | -0.615956 | 0.464464  |
| H | 3.856916  | -2.089797 | -0.074407 |
| H | 4.402693  | -0.895920 | -1.268819 |
| H | 3.564442  | 1.602682  | 0.243910  |
| H | 3.298244  | 1.290735  | -1.469130 |
| H | 0.835351  | 1.748552  | -1.176234 |
| H | 1.091954  | 2.034359  | 0.549727  |
| H | 1.809005  | 3.118845  | -0.642319 |
| H | 0.777358  | -0.495978 | -1.145649 |
| H | 1.667814  | -1.870757 | -1.097847 |

34

Energy(ZPE): -612.031895 in water Name: L-D Iva\_AN

|   |           |           |           |
|---|-----------|-----------|-----------|
| C | -2.313155 | 0.036861  | -0.494171 |
| N | -1.507165 | -1.184090 | -0.411295 |
| C | -1.947340 | 0.997545  | 0.586812  |
| N | -1.644679 | 1.717977  | 1.437495  |
| C | -2.038997 | 0.718766  | -1.847223 |
| C | -3.819851 | -0.296577 | -0.361252 |
| C | -4.221478 | -0.989398 | 0.942548  |
| H | -0.980629 | 0.964854  | -1.950998 |
| H | -2.623263 | 1.635076  | -1.948371 |
| H | -2.316579 | 0.028506  | -2.645984 |
| H | -4.065571 | -0.934250 | -1.215278 |
| H | -4.385703 | 0.632790  | -0.477217 |
| H | -3.963254 | -0.383763 | 1.816117  |
| H | -5.301173 | -1.154263 | 0.961173  |
| H | -3.741610 | -1.965684 | 1.048533  |
| H | -0.515970 | -0.985931 | -0.574379 |

|   |           |           |            |
|---|-----------|-----------|------------|
| H | -1.590459 | -1.623221 | 0.499819   |
| C | 2.365630  | -0.479219 | 0.156826   |
| N | 1.536154  | -0.701585 | -1.038429  |
| C | 3.797785  | -0.312593 | -0.214709  |
| N | 4.902578  | -0.186247 | -0.525814  |
| C | 2.246332  | -1.708290 | 1.075684   |
| C | 1.890033  | 0.792493  | 0.900372   |
| C | 1.917806  | 2.080207  | 0.075474   |
| H | 2.847316  | -1.576901 | 1.976845   |
| H | 2.578557  | -2.614203 | 0.563874   |
| H | 1.200420  | -1.830489 | 1.362363   |
| H | 2.509253  | 0.909269  | 1.794388   |
| H | 0.870519  | 0.591495  | 1.237414   |
| H | 1.611038  | 2.924668  | 0.696098   |
| H | 2.919598  | 2.294264  | -0.307964  |
| H | 1.227678  | 2.036510  | -0.770733  |
| H | 1.805877  | -1.560712 | -1.509897  |
| H | 1.645144  | 0.050831  | -1.711674a |
